# Supplementary material
Source: PubMed Central journal article supplement (PMC8084720)
Supplement: mmc1.pdf [file mmc1.pdf]

## **ISN-GKHA: Structures, organization and services for the management of kidney failure in Africa**

### **Supplementary Tables, Figures, and Appendix**

**Table S1:** Burden of chronic kidney disease and its risk factors in countries of Africa.

**Figure S1:** Affordability of kidney replacement therapy (proportion of out-of-pocket payments made by patients) in Africa.

**Figure S2:** Shortages in kidney failure providers identified by responding countries in Africa.

**Figure S3:** Accessibility of kidney replacement therapy in Africa.

**Figure S4:** Geographic and patient-based factors influencing accessibility to kidney replacement therapy in Africa.

**Figure S5:** Hemodialysis quality indicators monitored and reported in Africa.

**Figure S6:** Peritoneal dialysis quality indicators monitored and reported in Africa.

**Figure S7:** Kidney transplantation quality indicators monitored and reported in Africa.

**Figure S8:** Characteristics of acute kidney injury, chronic kidney disease, dialysis, and transplantation registries in Africa.

**Figure S9:** Strategies and advocacy efforts: (A) national NCD strategy, (B) national strategy to improve care for CKD patients, (C) population covered by national CKD-specific and general NCD strategy, (D) national advocacy for CKD/KF.

**Figure S10:** Barriers to optimal kidney failure care in Africa.

**Appendix:** Reference list for annual cost of kidney replacement therapy (for Table 1).

**Table S1:** Burden of chronic kidney disease and its risk factors in countries of Africa.<sup>S1, S2</sup>

| Country                  | CKD Prevalence<br>% (95% CI) | Death attributed to CKD<br>% (95% CI) | DALYs attributed to CKD<br>% (95% CI) | Obesity<br>% (95% CI) | Increased BP<br>% (95% CI) | Smoking<br>% (95% CI) |
|--------------------------|------------------------------|---------------------------------------|---------------------------------------|-----------------------|----------------------------|-----------------------|
| Global                   | 9.46 (8.81 - 10.20)          | 2.20 (2.24 - 2.13)                    | 1.43 (1.35 - 1.51)                    | 13.2 (12.5 - 13.9)    | 22.1 (20.4 - 24.1)         | 14.02 (12.91 - 15.12) |
| Africa                   | 6.28 (5.83 - 6.80)           | 1.40 (1.32 - 1.52)                    | 0.81 (0.76 - 0.87)                    | 9.10 (8.2 - 10.0)     | 27.4 (24.5 - 30.4)         | -                     |
| Algeria                  | 9.18 (8.50 - 10.01)          | 2.73 (2.45 - 3.02)                    | 1.57 (1.39 - 1.73)                    | 26.6 (21.7 - 32.0)    | 25.1 (19.4 - 31.5)         | 10.3 (8.4 - 12.5)     |
| Angola                   | 5.45 (5.04 - 5.90)           | 1.53 (1.34 - 1.71)                    | 0.86 (0.75 - 0.97)                    | 6.8 (4.2 - 10.3)      | 29.7 (22.1 - 38.3)         | 6.7 (5.6 - 8.0)       |
| Benin                    | 6.08 (5.65 - 6.58)           | 1.60 (1.36 - 1.87)                    | 0.96 (0.82 - 1.12)                    | 8.2 (6.0 - 10.8)      | 27.7 (21.7 - 34.2)         | 4.1 (3.3 - 5.0)       |
| Botswana                 | 8.95 (8.29 - 9.66)           | 1.86 (1.60 - 2.11)                    | 1.04 (0.90 - 1.18)                    | 16.1 (12.3 - 20.3)    | 29.6 (23.4 - 36.4)         | 11.1 (9.4 - 13.0)     |
| Burkina Faso             | 6.15 (5.69 - 6.64)           | 1.52 (1.33 - 1.72)                    | 0.87 (0.76 - 1.00)                    | 4.5 (3.1 - 6.3)       | 32.6 (25.3 - 40.1)         | 7.5 (5.9 - 9.5)       |
| Burundi                  | 5.06 (4.68 - 5.48)           | 1.19 (1.02 - 1.35)                    | 0.68 (0.58 - 0.79)                    | 4.4 (2.8 - 6.6)       | 29.2 (22.0 - 37.7)         | 4.7 (3.7 - 5.8)       |
| Cabo Verde               | 10.74 (9.97 - 11.66)         | 2.16 (1.99 - 2.34)                    | 1.50 (1.35 - 1.65)                    | 10.6 (7.5 - 14.0)     | 29.5 (22.6 - 36.8)         | 5.6 (4.3 - 7.1)       |
| Cameroon                 | 6.44 (5.99 - 6.98)           | 1.70 (1.44 - 1.97)                    | 1.07 (0.91 - 1.24)                    | 9.5 (7.1 - 12.2)      | 24.8 (18.8 - 31.8)         | 4.4 (3.6 - 5.3)       |
| Central African Republic | 6.25 (5.78 - 6.78)           | 1.03 (0.85 - 1.20)                    | 0.65 (0.54 - 0.78)                    | 6.3 (4.0 - 9.3)       | 31.2 (23.3 - 39.5)         | 5.8 (4.8 - 7.1)       |
| Chad                     | 5.23 (4.86 - 5.67)           | 1.07 (0.93 - 1.24)                    | 0.67 (0.59 - 0.76)                    | 4.8 (3.3 - 6.8)       | 32.9 (25.7 - 40.6)         | 5.2 (4.1 - 6.5)       |
| Comoros                  | 7.42 (6.87 - 8.04)           | 2.36 (2.09 - 2.66)                    | 1.36 (1.18 - 1.56)                    | 6.9 (4.7 - 9.6)       | 27.9 (21.3 - 35.3)         | 7.2 (6.0 - 8.5)       |
| Congo, Dem. Rep.         | 5.80 (5.38 - 6.27)           | 1.25 (1.07 - 1.43)                    | 0.70 (0.60 - 0.81)                    | 5.6 (3.7 - 8.0)       | 28.5 (21.1 - 36.5)         | 6.3 (5.5 - 7.3)       |
| Congo, Rep.              | 7.23 (6.69 - 7.82)           | 1.77 (1.56 - 1.99)                    | 1.07 (0.92 - 1.23)                    | 8.4 (5.8 - 11.5)      | 26.2 (19.1 - 34.3)         | 5.5 (4.6 - 6.7)       |
| Cote d'Ivoire            | 6.74 (6.24 - 7.32)           | 1.53 (1.34 - 1.81)                    | 0.99 (0.87 - 1.15)                    | 9.0 (6.7 - 11.9)      | 27.2 (20.7 - 34.2)         | 7.3 (6.1 - 8.7)       |
| Djibouti                 | 6.91 (6.38 - 7.49)           | 2.23 (1.98 - 2.48)                    | 1.31 (1.16 - 1.46)                    | 12.2 (8.6 - 16.7)     | 26.8 (19.5 - 35.0)         | 11.4 (9.5 - 13.5)     |
| Egypt                    | 7.69 (7.09 - 8.37)           | 2.63 (2.29 - 2.92)                    | 1.71 (1.53 - 1.90)                    | 31.1 (26.7 - 35.5)    | 25.0 (19.8 - 30.6)         | 16.0 (14.4 - 17.8)    |
| Equatorial Guinea        | 5.75 (5.33 - 6.23)           | 1.84 (1.55 - 2.10)                    | 0.96 (0.80 - 1.11)                    | 7.4 (4.6 - 10.8)      | 28.4 (20.8 - 36.9)         | 4.9 (4.0 - 6.0)       |
| Eritrea                  | 5.35 (4.96 - 5.80)           | 1.53 (1.32 - 1.75)                    | 0.99 (0.84 - 1.15)                    | 4.1 (2.6 - 6.0)       | 29.1 (22.3 - 36.3)         | 5.1 (4.0 - 6.4)       |
| Ethiopia                 | 4.98 (4.63 - 5.38)           | 1.69 (1.54 - 1.90)                    | 0.84 (0.77 - 0.94)                    | 3.6 (2.3 - 5.2)       | 30.3 (23.1 - 38.0)         | 3.1 (2.4 - 3.8)       |
| Gabon                    | 8.31 (7.71 - 9.00)           | 2.66 (2.34 - 3.01)                    | 1.46 (1.26 - 1.66)                    | 13.4 (9.5 - 18.1)     | 25.5 (18.4 - 33.7)         | 8.3 (7.0 - 9.8)       |
| Gambia, The              | 6.54 (6.06 - 7.07)           | 1.78 (1.50 - 2.14)                    | 1.12 (0.92 - 1.36)                    | 8.7 (6.3 - 11.6)      | 29.1 (22.5 - 36.4)         | 8.9 (7.4 - 10.4)      |
| Ghana                    | 7.67 (7.11 - 8.31)           | 1.77 (1.56 - 1.97)                    | 1.28 (1.10 - 1.44)                    | 9.7 (7.5 - 12.2)      | 23.7 (18.7 - 29.3)         | 2.5 (2.0 - 3.1)       |
| Guinea                   | 6.43 (5.97 - 6.95)           | 1.47 (1.30 - 1.69)                    | 0.91 (0.80 - 1.03)                    | 6.6 (4.6 - 8.9)       | 30.3 (23.7 - 37.4)         | 3.8 (2.9 - 4.8)       |
| Guinea-Bissau            | 6.40 (5.92 - 6.94)           | 1.68 (1.43 - 2.00)                    | 1.12 (0.93 - 1.34)                    | 8.2 (5.7 - 11.3)      | 30.3 (23.2 - 37.7)         | 5.8 (4.7 - 7.2)       |
| Kenya                    | 5.75 (5.34 - 6.23)           | 1.62 (1.47 - 1.80)                    | 0.91 (0.83 - 1.00)                    | 6.0 (4.3 - 8.2)       | 26.7 (20.2 - 34.0)         | 6.7 (6.5 - 7.0)       |
| Lesotho                  | 8.81 (8.19 - 9.54)           | 1.65 (1.43 - 1.89)                    | 1.04 (0.89 - 1.22)                    | 13.5 (10.3 - 16.9)    | 29.0 (22.6 - 35.6)         | 13.2 (11.8 - 14.8)    |

|                     |                       |                      |                    |                    |                    |                    |
|---------------------|-----------------------|----------------------|--------------------|--------------------|--------------------|--------------------|
| Liberia             | 6.63 (6.14 - 7.18)    | 1.66 (1.38 - 1.95)   | 0.99 (0.83 - 1.16) | 8.6 (6.2 - 11.4)   | 28.3 (22.2 - 35.2) | 4.5 (3.8 - 5.4)    |
| Libya               | 9.01 (8.31 - 9.79)    | 3.43 (3.11 - 3.80)   | 1.92 (1.70 - 2.17) | 31.8 (26.5 - 37.4) | 23.7 (18.0 - 29.8) | 13.0 (11.3 - 15.0) |
| Madagascar          | 5.22 (4.81 - 5.65)    | 1.13 (0.98 - 1.28)   | 0.67 (0.57 - 0.77) | 4.5 (2.9 - 6.4)    | 28.1 (21.4 - 35.4) | 9.2 (7.6 - 11.0)   |
| Malawi              | 5.9 (5.47 - 6.4)      | 1.5 (1.31 - 1.66)    | 0.79 (0.69 - 0.90) | 4.7 (3.2 - 6.5)    | 28.9 (22.1 - 36.3) | 6.1 (5.1 - 7.3)    |
| Mali                | 5.67 (5.26 - 6.14)    | 1.15 (0.97 - 1.36)   | 0.76 (0.65 - 0.89) | 7.1 (5.1 - 9.6)    | 32.6 (25.4 - 40.4) | 4.9 (4.1 - 6.0)    |
| Mauritania          | 7.17 (6.65 - 7.77)    | 2.29 (1.98 - 2.69)   | 1.33 (1.15 - 1.52) | 11.3 (8.3 - 14.9)  | 31.7 (24.3 - 40.0) | 8.5 (6.7 - 10.8)   |
| Mauritius           | 17.63 (16.32 - 19.06) | 10.36 (9.62 - 10.96) | 6.85 (6.07 - 7.59) | 11.5 (8.4 - 15.2)  | 25.0 (18.9 - 31.9) | 15.8 (13.6 - 18.2) |
| Morocco             | 9.65 (8.93 - 10.46)   | 2.06 (1.87 - 2.27)   | 1.39 (1.25 - 1.53) | 25.6 (20.7 - 30.9) | 26.1 (20.0 - 32.9) | 8.3 (6.8 - 10.0)   |
| Mozambique          | 5.29 (4.9 - 5.72)     | 1.01 (0.87 - 1.28)   | 0.65 (0.56 - 0.77) | 6.0 (4.1 - 8.2)    | 29.1 (22.2 - 36.6) | 7.8 (6.5 - 9.3)    |
| Namibia             | 7.86 (7.3 - 8.54)     | 1.47 (1.28 - 1.72)   | 0.81 (0.70 - 0.94) | 15.0 (11.5 - 18.7) | 28.5 (22.3 - 35.0) | 10.4 (8.9 - 12.2)  |
| Niger               | 5.0 (4.62 - 5.4)      | 1.03 (0.86 - 1.26)   | 0.66 (0.56 - 0.79) | 4.7 (3.2 - 6.7)    | 33.4 (25.9 - 41.4) | 4.0 (3.2 - 4.9)    |
| Nigeria             | 6.3 (5.81 - 6.89)     | 0.87 (0.72 - 1.07)   | 0.58 (0.49 - 0.69) | 7.8 (5.9 - 9.9)    | 23.9 (18.7 - 29.5) | 2.9 (2.3 - 3.6)    |
| Rwanda              | 5.86 (5.41 - 6.38)    | 1.68 (1.46 - 1.94)   | 0.90 (0.78 - 1.03) | 4.8 (3.2 - 6.7)    | 26.7 (19.7 - 34.3) | 6.3 (5.3 - 7.4)    |
| Sao Tome & Principe | 8.10 (7.51 - 8.78)    | 4.32 (3.91 - 4.79)   | 2.72 (2.42 - 3.08) | 10.6 (7.7 - 14.1)  | 25.8 (19.7 - 33.0) | 2.9 (2.3 - 3.6)    |
| Senegal             | 6.93 (6.43 - 7.51)    | 2.2 (1.93 - 2.58)    | 1.33 (1.16 - 1.56) | 7.4 (5.2 - 9.9)    | 30.2 (23.0 - 38.0) | 4.4 (3.7 - 5.3)    |
| Seychelles          | 12.77 (11.85 - 13.76) | 5.44 (5.06 - 5.79)   | 3.70 (3.33 - 4.07) | 14.6 (11.0 - 18.6) | 23.5 (17.6 - 30.2) | 15.1 (12.6 - 17.7) |
| Sierra Leone        | 6.6 (6.12 - 7.15)     | 1.26 (1.1 - 1.44)    | 0.81 (0.70 - 0.94) | 7.5 (5.3 - 10.1)   | 30.3 (23.4 - 37.2) | 10.9 (9.3 - 12.8)  |
| Somalia             | 5.14 (4.76 - 5.56)    | 1.39 (1.2 - 1.58)    | 0.80 (0.69 - 0.90) | 6.9 (4.5 - 9.8)    | 32.9 (25.2 - 41.3) | 6.0 (4.9 - 7.5)    |
| South Africa        | 10.71 (9.94 - 11.57)  | 1.93 (1.79 - 2.05)   | 1.13 (1.05 - 1.21) | 27.0 (23.4 - 30.8) | 26.9 (21.7 - 32.7) | 14.6 (13.9 - 15.3) |
| South Sudan         | 5.06 (4.70 - 5.47)    | 1.28 (1.08 - 1.49)   | 0.69 (0.58 - 0.81) | -                  | -                  | 6.4 (5.1 - 7.9)    |
| Sudan               | 5.85 (5.43 - 6.37)    | 1.52 (1.36 - 1.69)   | 0.96 (0.85 - 1.07) | -                  | -                  | 1.0 (0.7 - 1.5)    |
| Swaziland           | 8.18 (7.59 - 8.83)    | 2.1 (1.64 - 2.41)    | 1.30 (1.03 - 1.52) | 13.5 (10.0 - 17.5) | 29.8 (23.3 - 37.0) | 4.7 (4.0 - 5.5)    |
| Tanzania            | 5.63 (5.22 - 6.14)    | 1.7 (1.49 - 1.93)    | 0.91 (0.80 - 1.04) | 7.1 (5.3 - 9.4)    | 27.3 (21.4 - 33.8) | 6.9 (5.9 - 8.0)    |
| Togo                | 6.92 (6.38 - 7.5)     | 1.5 (1.3 - 1.71)     | 0.98 (0.84 - 1.13) | 7.1 (4.9 - 9.7)    | 28.9 (22.4 - 35.8) | 3.9 (3.2 - 4.7)    |
| Tunisia             | 11.15 (10.31 - 12.23) | 2.48 (2.24 - 2.77)   | 1.62 (1.46 - 1.78) | 27.3 (22.4 - 32.1) | 23.2 (17.7 - 29.0) | 19.9 (17.3 - 22.7) |
| Uganda              | 4.87 (4.51 - 5.28)    | 1.3 (1.13 - 1.44)    | 0.69 (0.60 - 0.77) | 4.1 (2.8 - 5.8)    | 27.3 (21.0 - 34.2) | 5.2 (4.4 - 6.2)    |
| Zambia              | 5.26 (4.88 - 5.67)    | 0.57 (1.37 - 1.76)   | 0.86 (0.75 - 0.98) | 6.5 (4.6 - 8.8)    | 27.1 (20.8 - 34.1) | 6.5 (5.2 - 8.0)    |
| Zimbabwe            | 6.7 (6.22 - 7.25)     | 1.48 (1.31 - 1.69)   | 0.89 (0.78 - 1.02) | 12.3 (9.4 - 15.6)  | 28.2 (21.6 - 35.7) | 8.8 (7.9 - 9.9)    |

Abbreviations: CKD: chronic kidney disease; DALYs: disability-adjusted life years; BP: blood pressure; CI: confidence interval; Dem. Rep.: Democratic Republic  
 “-“: Data not reported/unavailable

**Figure S1:** Affordability of kidney replacement therapy (proportion of out-of-pocket payments made by patients) in Africa.

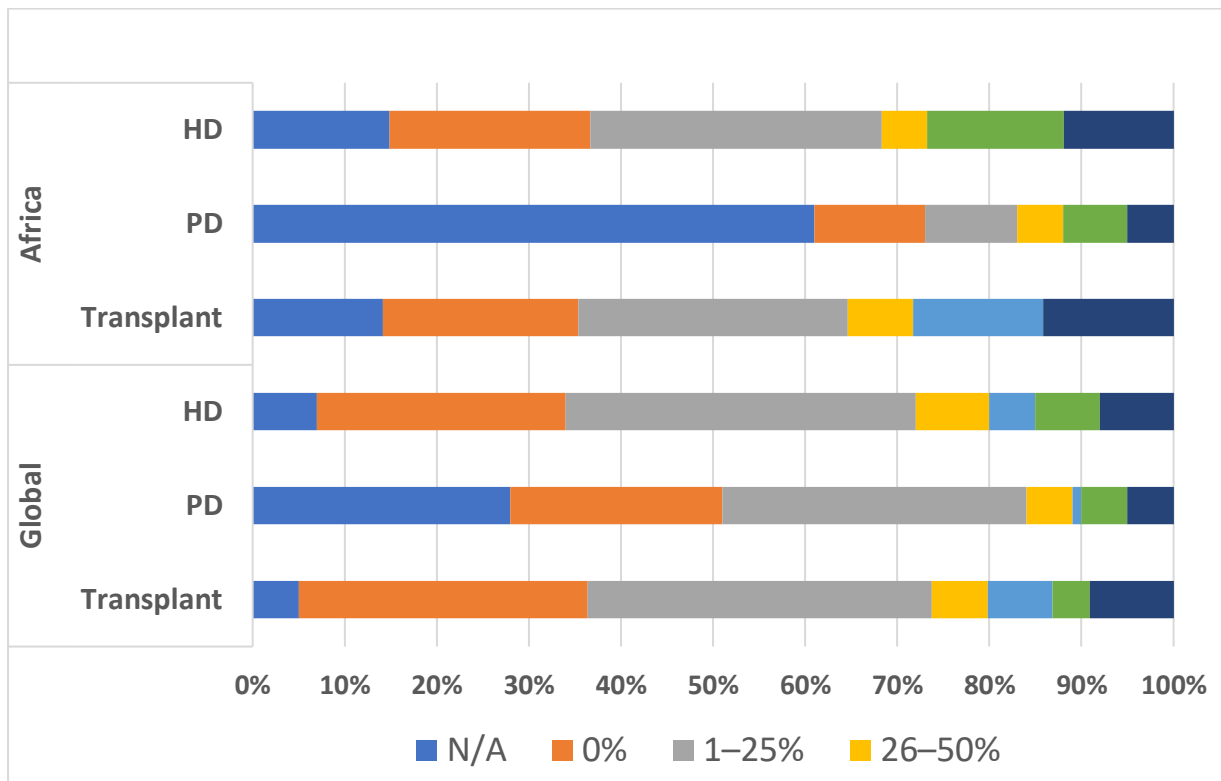

Abbreviations: HD: hemodialysis, PD: peritoneal dialysis, KRT: kidney replacement therapy, OOP: out-of-pocket payment (Values represent absolute number of countries in each category expressed as a percentage of total number of countries)

**Figure S2:** Shortages in kidney failure providers identified by responding countries in Africa.

| Country          | Nephrologists | Transplant surgeons | Surgeons (HD access) | Surgeons (PD access) | Interventional radiologists (HD access) | Interventional radiologists (PD access) | Laboratory technicians | Dietitians | Radiologists (ultrasound) | Vascular access coordinators | Counselors / psychologists | Transplant coordinators | Dialysis nurses | Dialysis technicians | Total shortage |
|------------------|---------------|---------------------|----------------------|----------------------|-----------------------------------------|-----------------------------------------|------------------------|------------|---------------------------|------------------------------|----------------------------|-------------------------|-----------------|----------------------|----------------|
| Total shortage → | 36            | 35                  | 35                   | 35                   | 36                                      | 31                                      | 33                     | 14         | 15                        | 32                           | 31                         | 31                      | 29              | 35                   |                |
| Algeria          |               |                     |                      |                      |                                         |                                         |                        |            |                           |                              |                            |                         |                 |                      | 8              |
| Angola           |               |                     |                      |                      |                                         |                                         |                        |            |                           |                              |                            |                         |                 |                      | 13             |
| Benin            |               |                     |                      |                      |                                         |                                         |                        |            |                           |                              |                            |                         |                 |                      | 14             |
| Botswana         |               |                     |                      |                      |                                         |                                         |                        |            |                           |                              |                            |                         |                 |                      | 13             |
| Burkina Faso     |               |                     |                      |                      |                                         |                                         |                        |            |                           |                              |                            |                         |                 |                      | 8              |
| Burundi          |               |                     |                      |                      |                                         |                                         |                        |            |                           |                              |                            |                         |                 |                      | 13             |
| Cabo Verde       |               |                     |                      |                      |                                         |                                         |                        |            |                           |                              |                            |                         |                 |                      | 8              |
| Cameroon         |               |                     |                      |                      |                                         |                                         |                        |            |                           |                              |                            |                         |                 |                      | 5              |
| Chad             |               |                     |                      |                      |                                         |                                         |                        |            |                           |                              |                            |                         |                 |                      | 10             |
| Congo, Dem. Rep. |               |                     |                      |                      |                                         |                                         |                        |            |                           |                              |                            |                         |                 |                      | 14             |
| Congo, Rep.      |               |                     |                      |                      |                                         |                                         |                        |            |                           |                              |                            |                         |                 |                      | 7              |
| Cote d'Ivoire    |               |                     |                      |                      |                                         |                                         |                        |            |                           |                              |                            |                         |                 |                      | 5              |
| Egypt            |               |                     |                      |                      |                                         |                                         |                        |            |                           |                              |                            |                         |                 |                      | 10             |
| Eritrea          |               |                     |                      |                      |                                         |                                         |                        |            |                           |                              |                            |                         |                 |                      | 12             |
| Ethiopia         |               |                     |                      |                      |                                         |                                         |                        |            |                           |                              |                            |                         |                 |                      | 14             |
| Gabon            |               |                     |                      |                      |                                         |                                         |                        |            |                           |                              |                            |                         |                 |                      | 11             |
| Gambia, The      |               |                     |                      |                      |                                         |                                         |                        |            |                           |                              |                            |                         |                 |                      | 14             |
| Ghana            |               |                     |                      |                      |                                         |                                         |                        |            |                           |                              |                            |                         |                 |                      | 14             |
| Guinea           |               |                     |                      |                      |                                         |                                         |                        |            |                           |                              |                            |                         |                 |                      | 11             |
| Kenya            |               |                     |                      |                      |                                         |                                         |                        |            |                           |                              |                            |                         |                 |                      | 14             |
| Liberia          |               |                     |                      |                      |                                         |                                         |                        |            |                           |                              |                            |                         |                 |                      | 14             |
| Libya            |               |                     |                      |                      |                                         |                                         |                        |            |                           |                              |                            |                         |                 |                      | 11             |
| Madagascar       |               |                     |                      |                      |                                         |                                         |                        |            |                           |                              |                            |                         |                 |                      | 2              |
| Malawi           |               |                     |                      |                      |                                         |                                         |                        |            |                           |                              |                            |                         |                 |                      | 11             |
| Mauritania       |               |                     |                      |                      |                                         |                                         |                        |            |                           |                              |                            |                         |                 |                      | 11             |
| Morocco          |               |                     |                      |                      |                                         |                                         |                        |            |                           |                              |                            |                         |                 |                      | 2              |
| Mozambique       |               |                     |                      |                      |                                         |                                         |                        |            |                           |                              |                            |                         |                 |                      | 8              |
| Namibia          |               |                     |                      |                      |                                         |                                         |                        |            |                           |                              |                            |                         |                 |                      | 13             |
| Niger            |               |                     |                      |                      |                                         |                                         |                        |            |                           |                              |                            |                         |                 |                      | 8              |
| Nigeria          |               |                     |                      |                      |                                         |                                         |                        |            |                           |                              |                            |                         |                 |                      | 10             |
| Senegal          |               |                     |                      |                      |                                         |                                         |                        |            |                           |                              |                            |                         |                 |                      | 11             |
| Sierra Leone     |               |                     |                      |                      |                                         |                                         |                        |            |                           |                              |                            |                         |                 |                      | 14             |
| Somalia          |               |                     |                      |                      |                                         |                                         |                        |            |                           |                              |                            |                         |                 |                      | 11             |
| South Africa     |               |                     |                      |                      |                                         |                                         |                        |            |                           |                              |                            |                         |                 |                      | 9              |
| Sudan            |               |                     |                      |                      |                                         |                                         |                        |            |                           |                              |                            |                         |                 |                      | 8              |
| Swaziland        |               |                     |                      |                      |                                         |                                         |                        |            |                           |                              |                            |                         |                 |                      | 13             |
| Tanzania         |               |                     |                      |                      |                                         |                                         |                        |            |                           |                              |                            |                         |                 |                      | 14             |
| Tunisia          |               |                     |                      |                      |                                         |                                         |                        |            |                           |                              |                            |                         |                 |                      | 7              |
| Uganda           |               |                     |                      |                      |                                         |                                         |                        |            |                           |                              |                            |                         |                 |                      | 12             |
| Zambia           |               |                     |                      |                      |                                         |                                         |                        |            |                           |                              |                            |                         |                 |                      | 8              |
| Zimbabwe         |               |                     |                      |                      |                                         |                                         |                        |            |                           |                              |                            |                         |                 |                      | 12             |

Abbreviations: HD: hemodialysis, PD: peritoneal dialysis, KF: kidney failure; Dem. Rep.: Democratic Republic

 No shortage  
 Shortage

**Figure S3:** Accessibility of kidney replacement therapy in Africa.

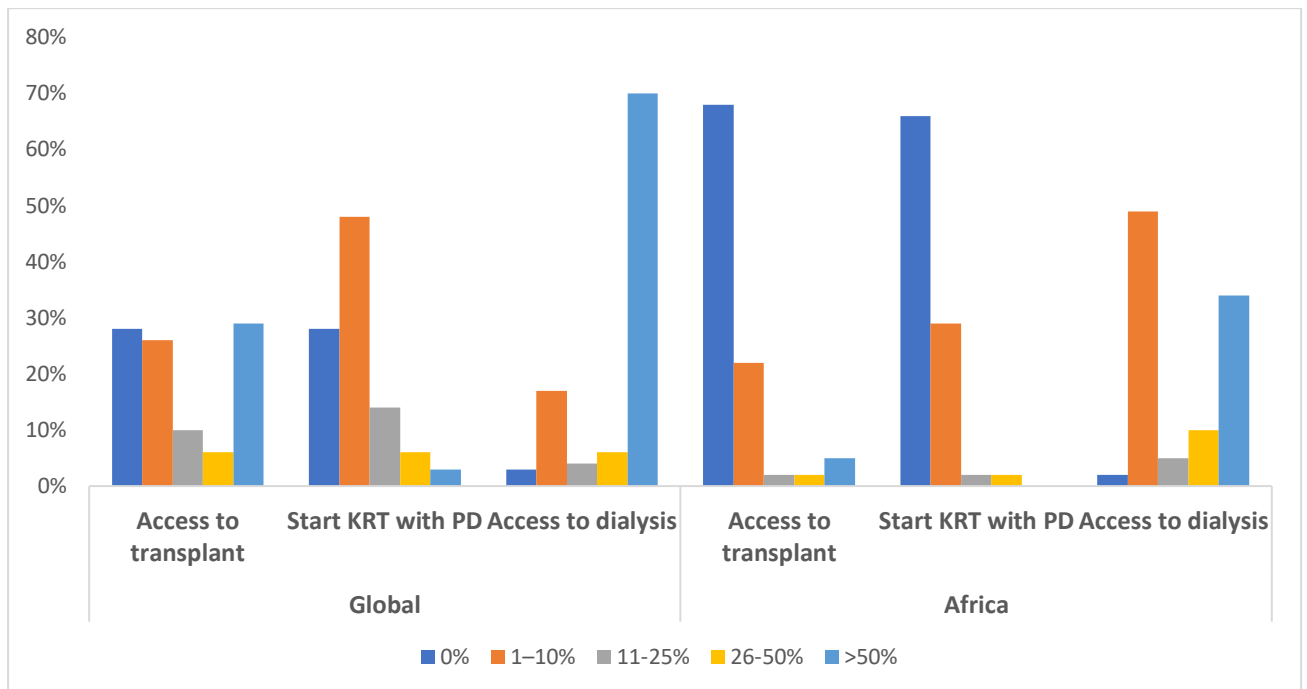

Abbreviations: KRT: kidney replacement therapy; PD: peritoneal dialysis

(Values represent absolute number of countries in each category expressed as a percentage of total number of countries)

**Figure S4:** Geographic and patient-based factors influencing accessibility to kidney replacement therapy in Africa.

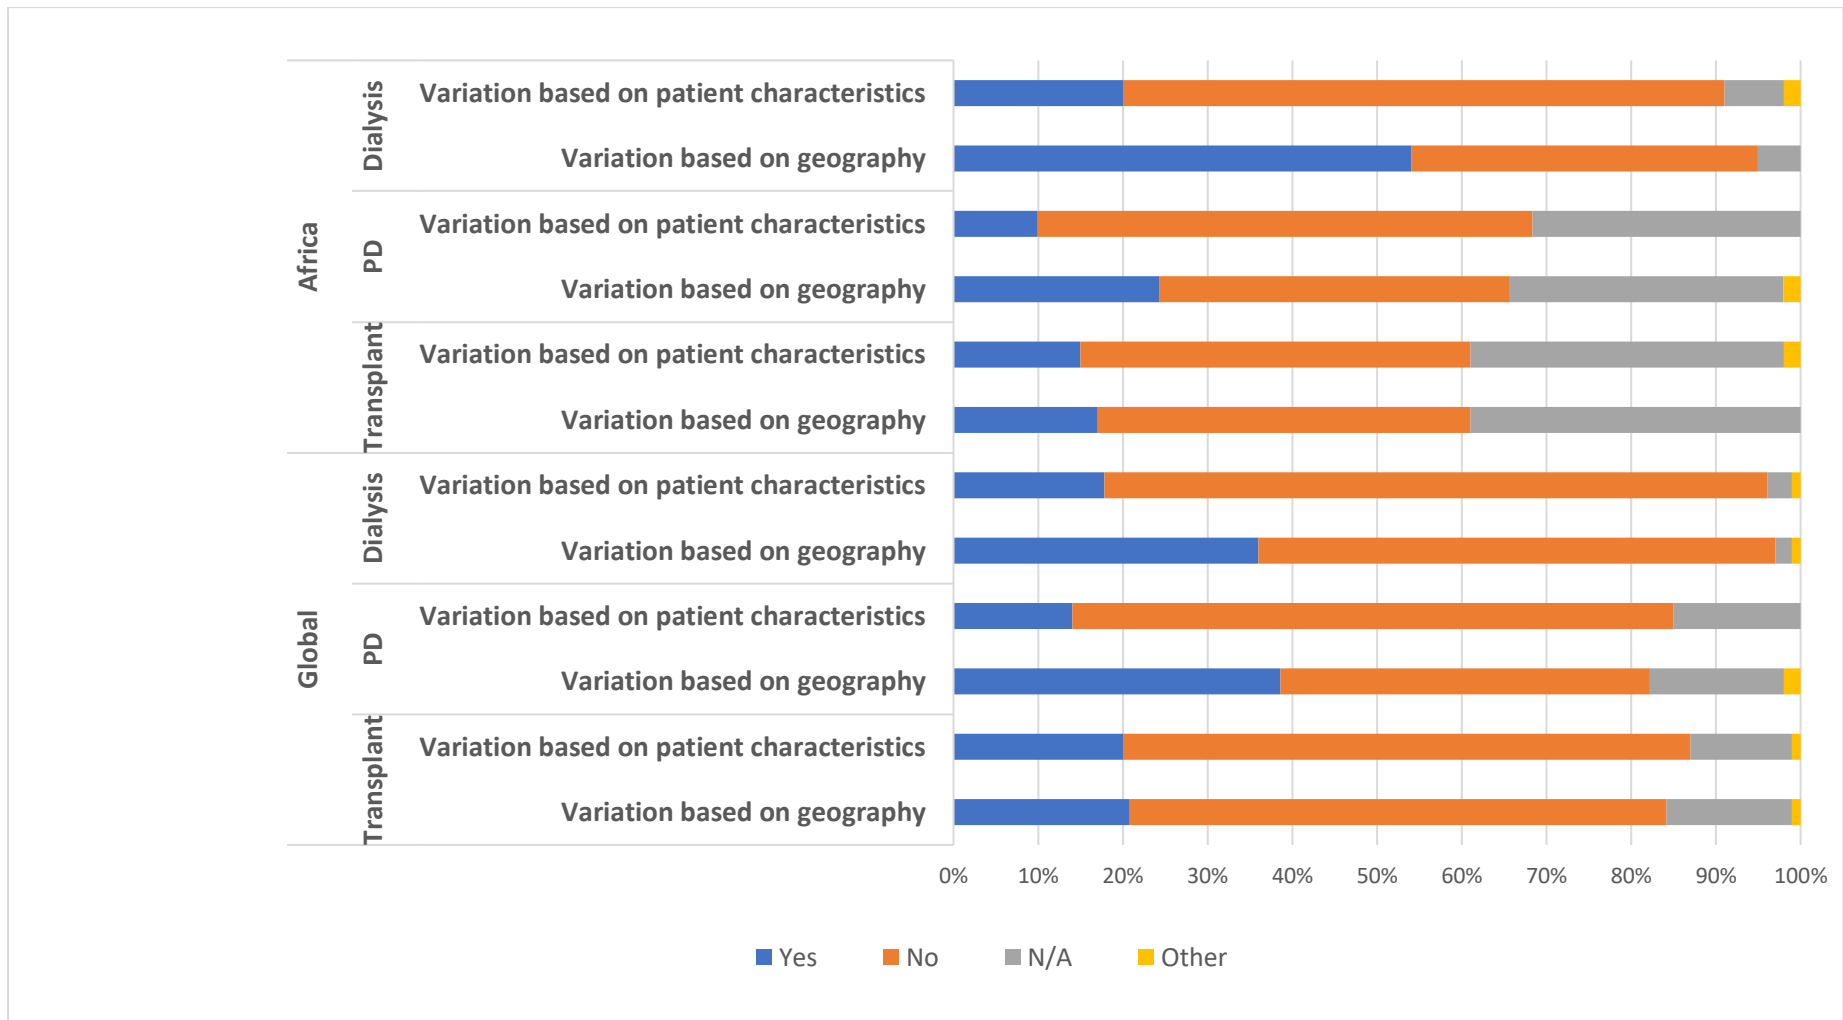

Abbreviations: KRT: kidney replacement therapy. PD: peritoneal dialysis  
 (Values represent absolute number of countries in each category expressed as a percentage of total number of countries)

**Figure S5:** Hemodialysis quality indicators monitored and reported in Africa.

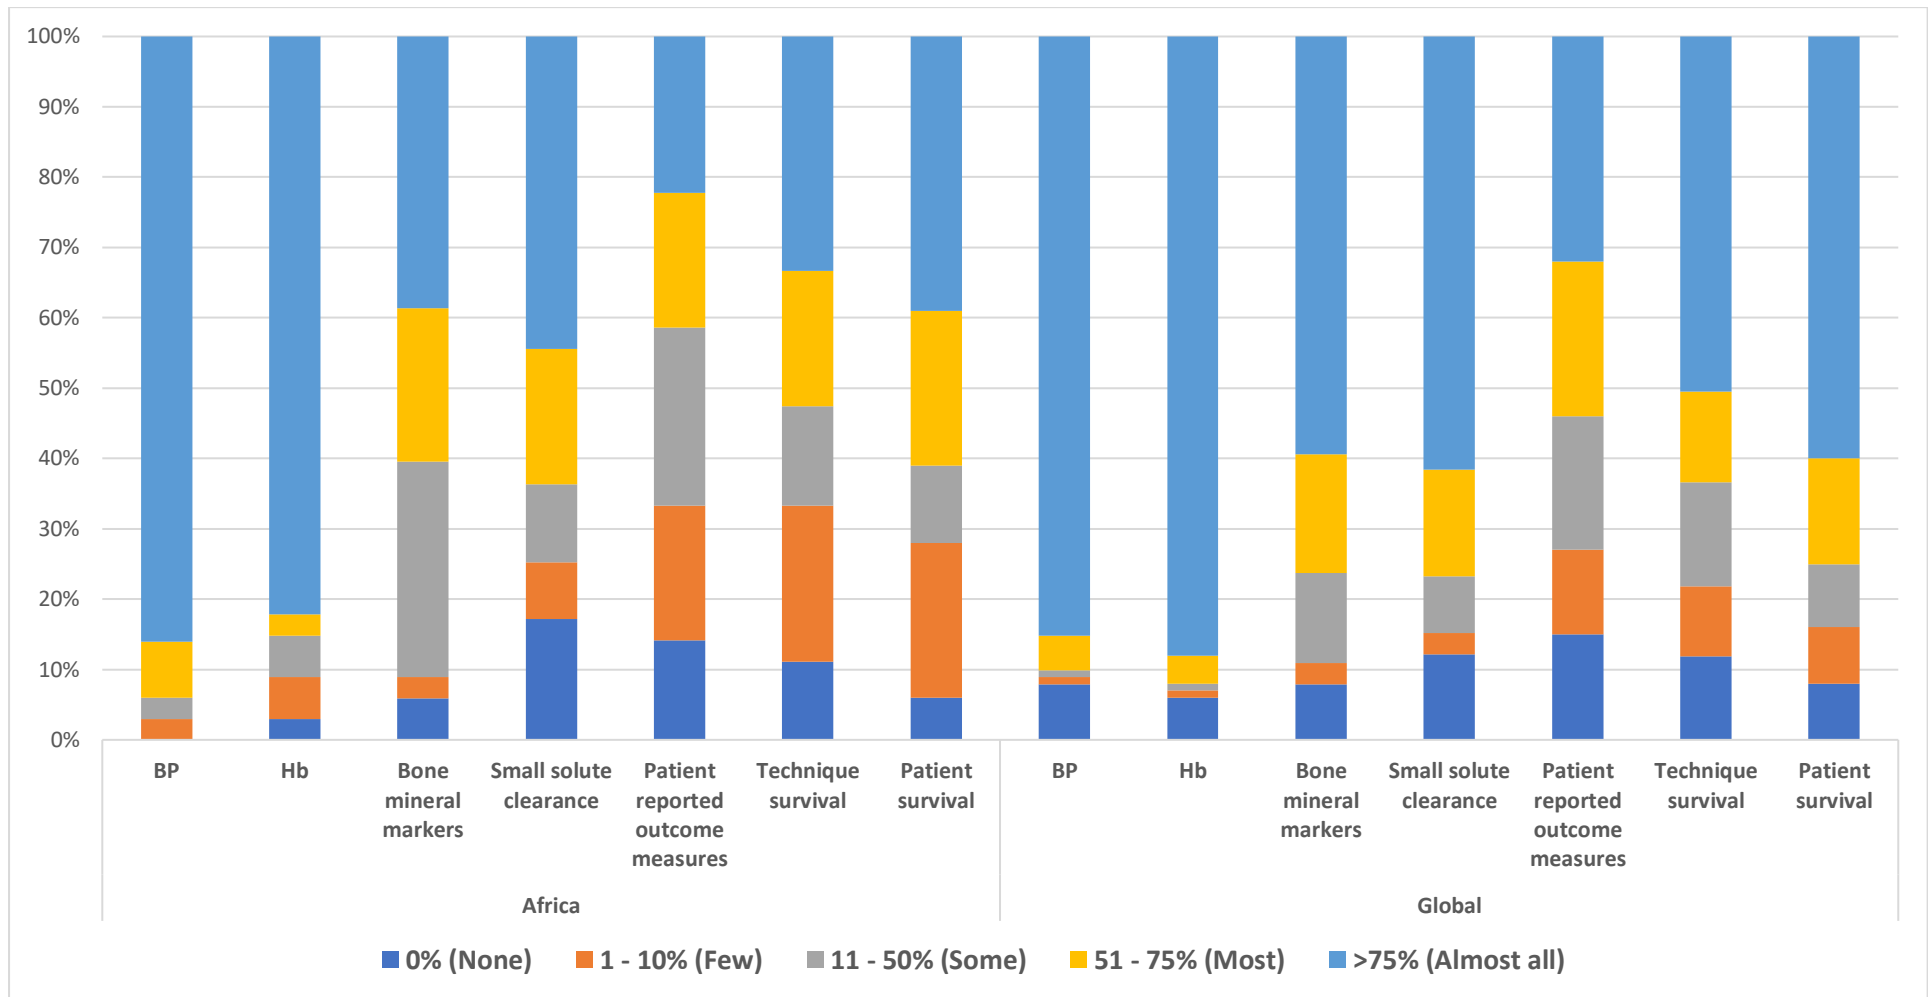

Abbreviations: BP: blood pressure; Hb: hemoglobin

(Values represent absolute number of countries in each category expressed as a percentage of total number of countries)



**Figure S6:** Peritoneal dialysis quality indicators monitored and reported in Africa.

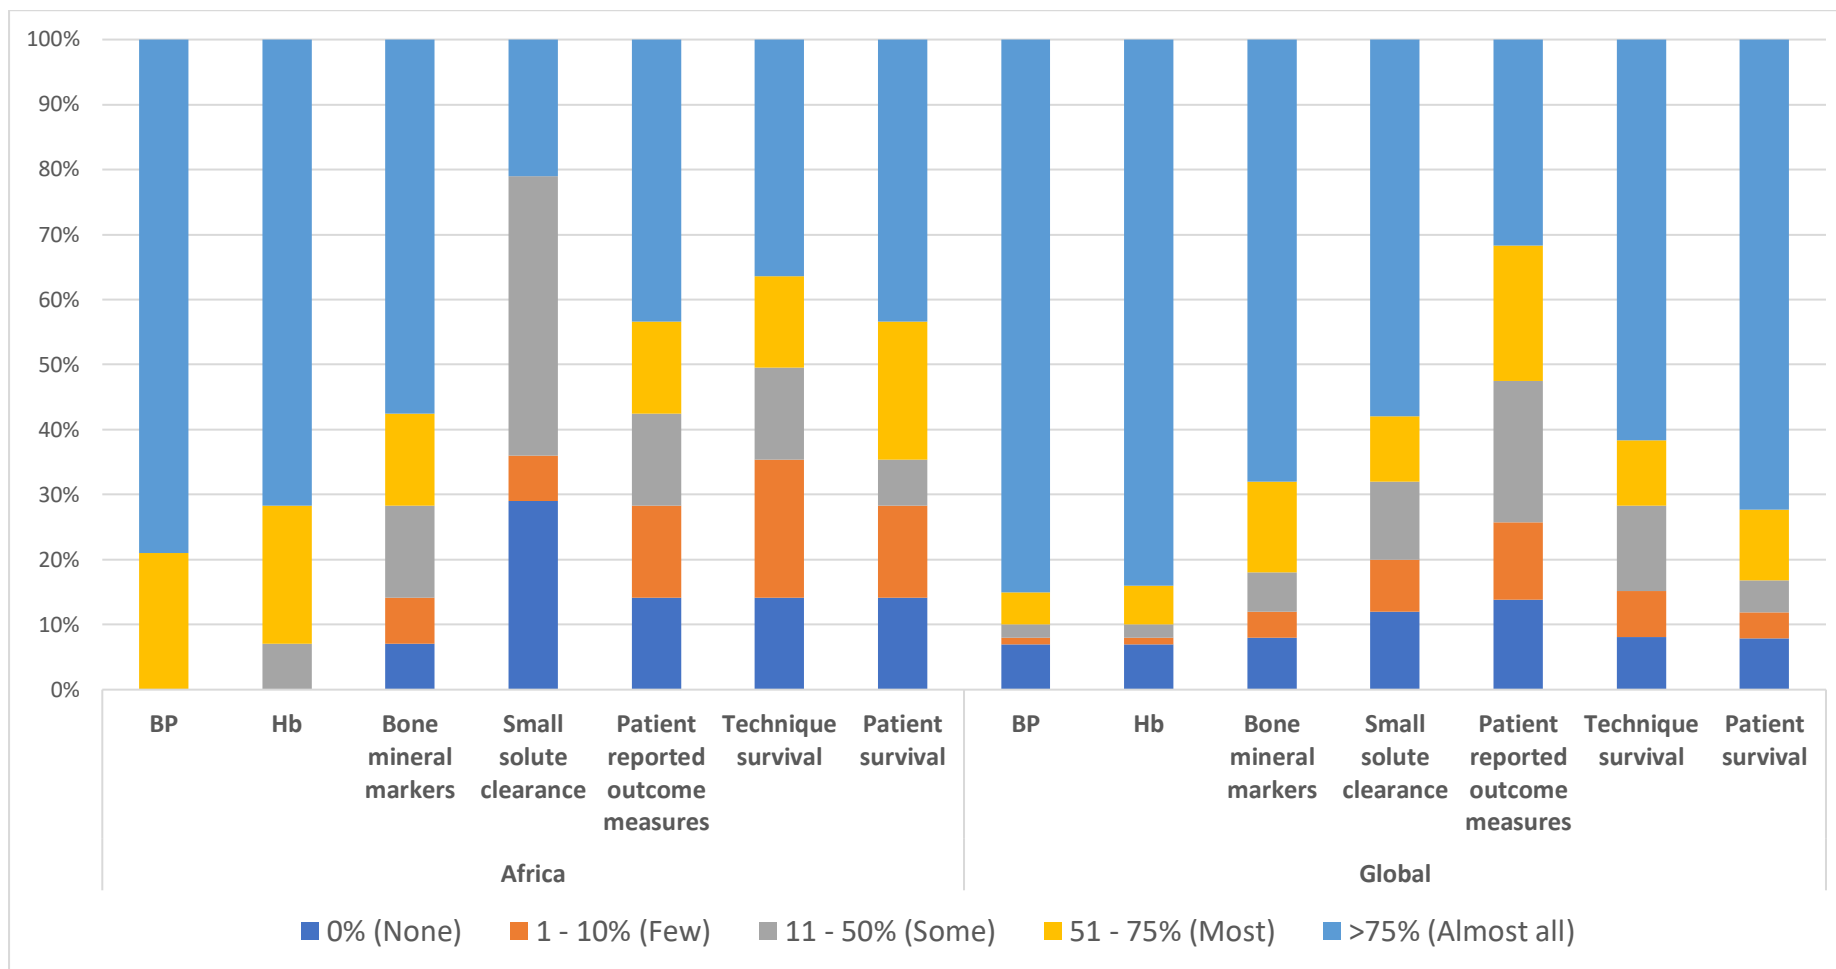

Abbreviations: BP: blood pressure, Hb: hemoglobin.

(Values represent absolute number of countries in each category expressed as a percentage of total number of countries)

**Figure S7: Kidney transplantation quality indicators monitored and reported in Africa.**

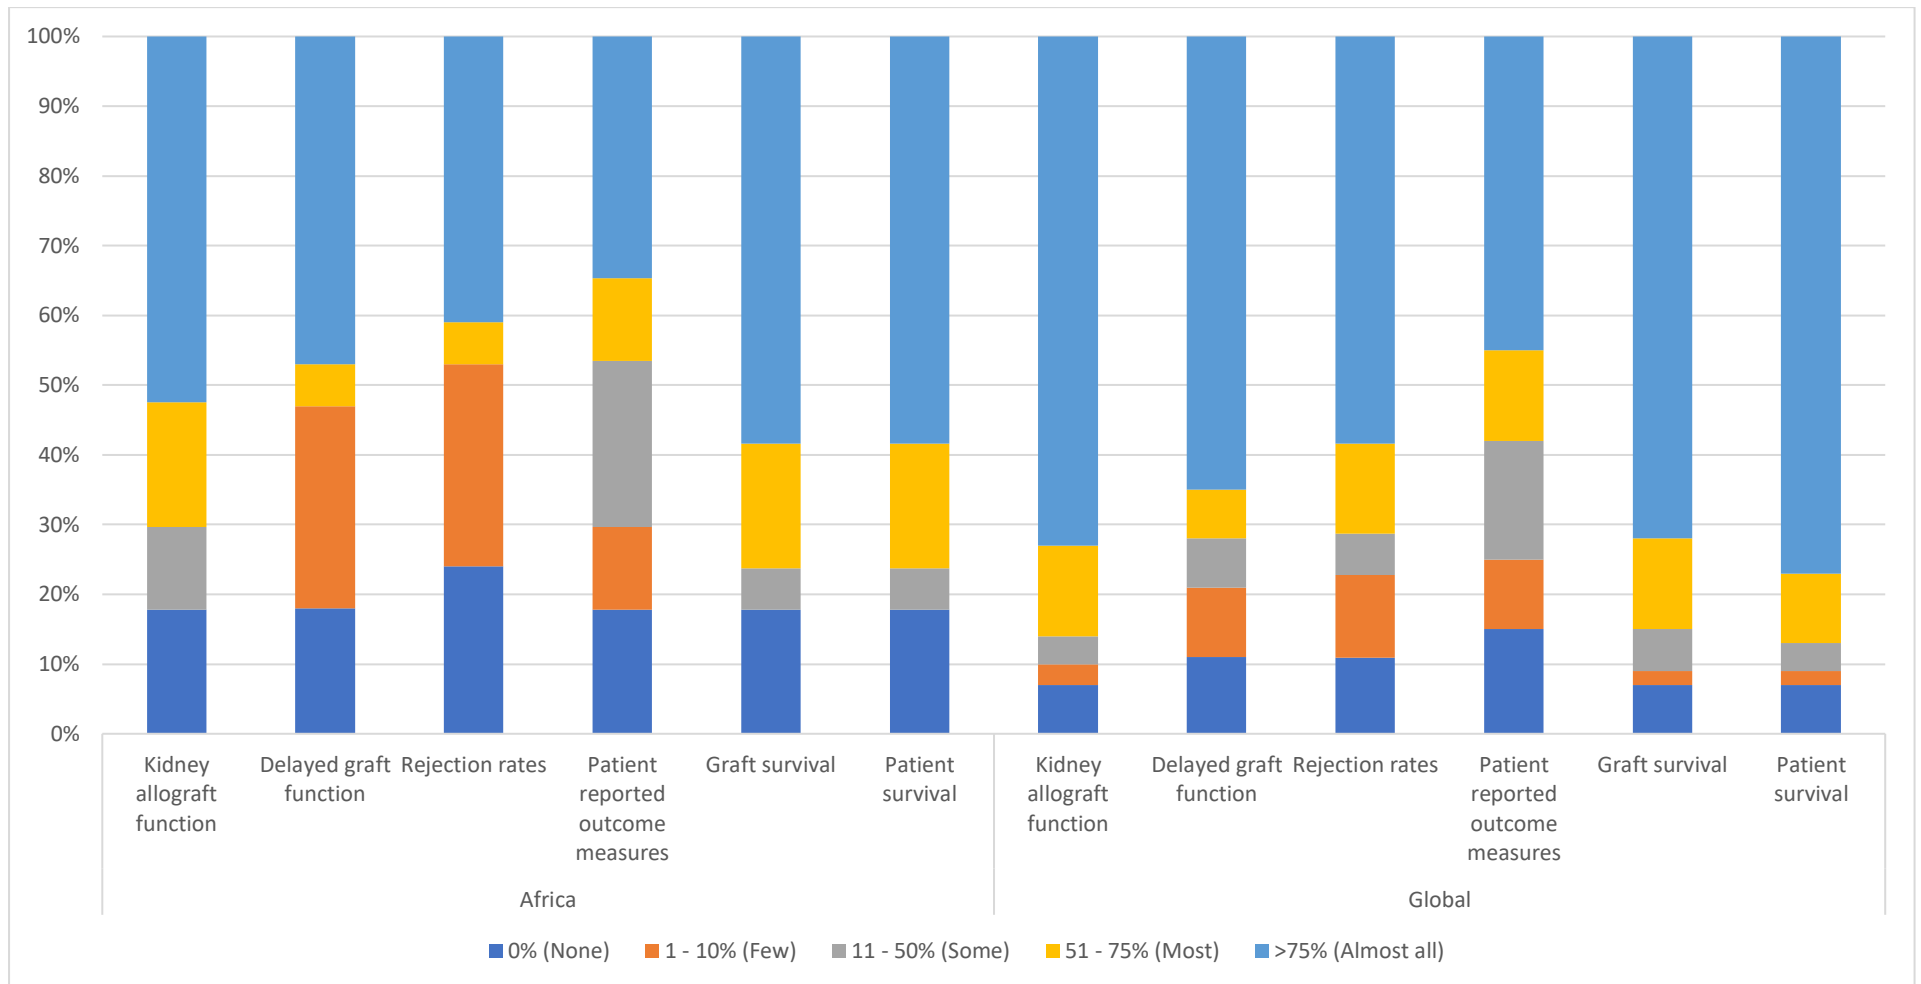

(Values represent absolute number of countries in each category expressed as a percentage of total number of countries)

**Figure S8:** Characteristics of acute kidney injury, chronic kidney disease, dialysis, and transplantation registries in Africa.

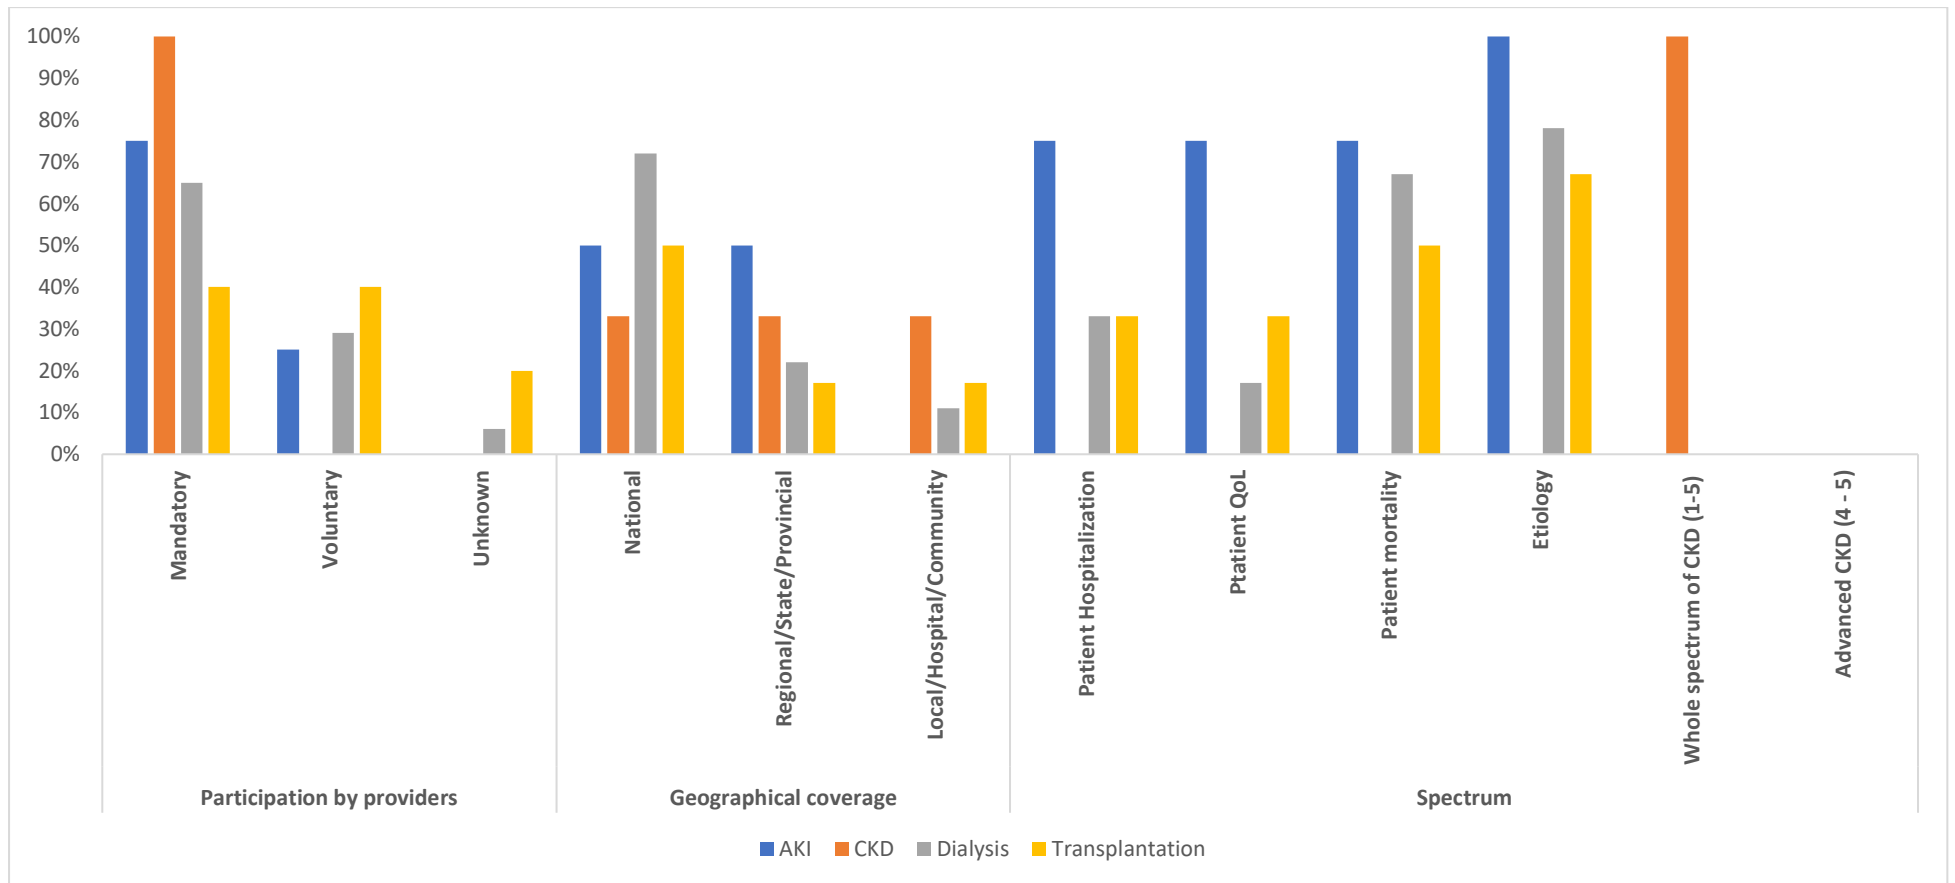

AKI: acute kidney injury, CKD: chronic kidney disease,

(Values represent absolute number of countries in each category expressed as a percentage of total number of countries)

**Figure S9: Strategies and advocacy efforts:** (A) national NCD strategy, (B) national strategy to improve care for CKD patients, (C) population covered by national CKD-specific and general NCD strategy, (D) national advocacy for CKD/KF.

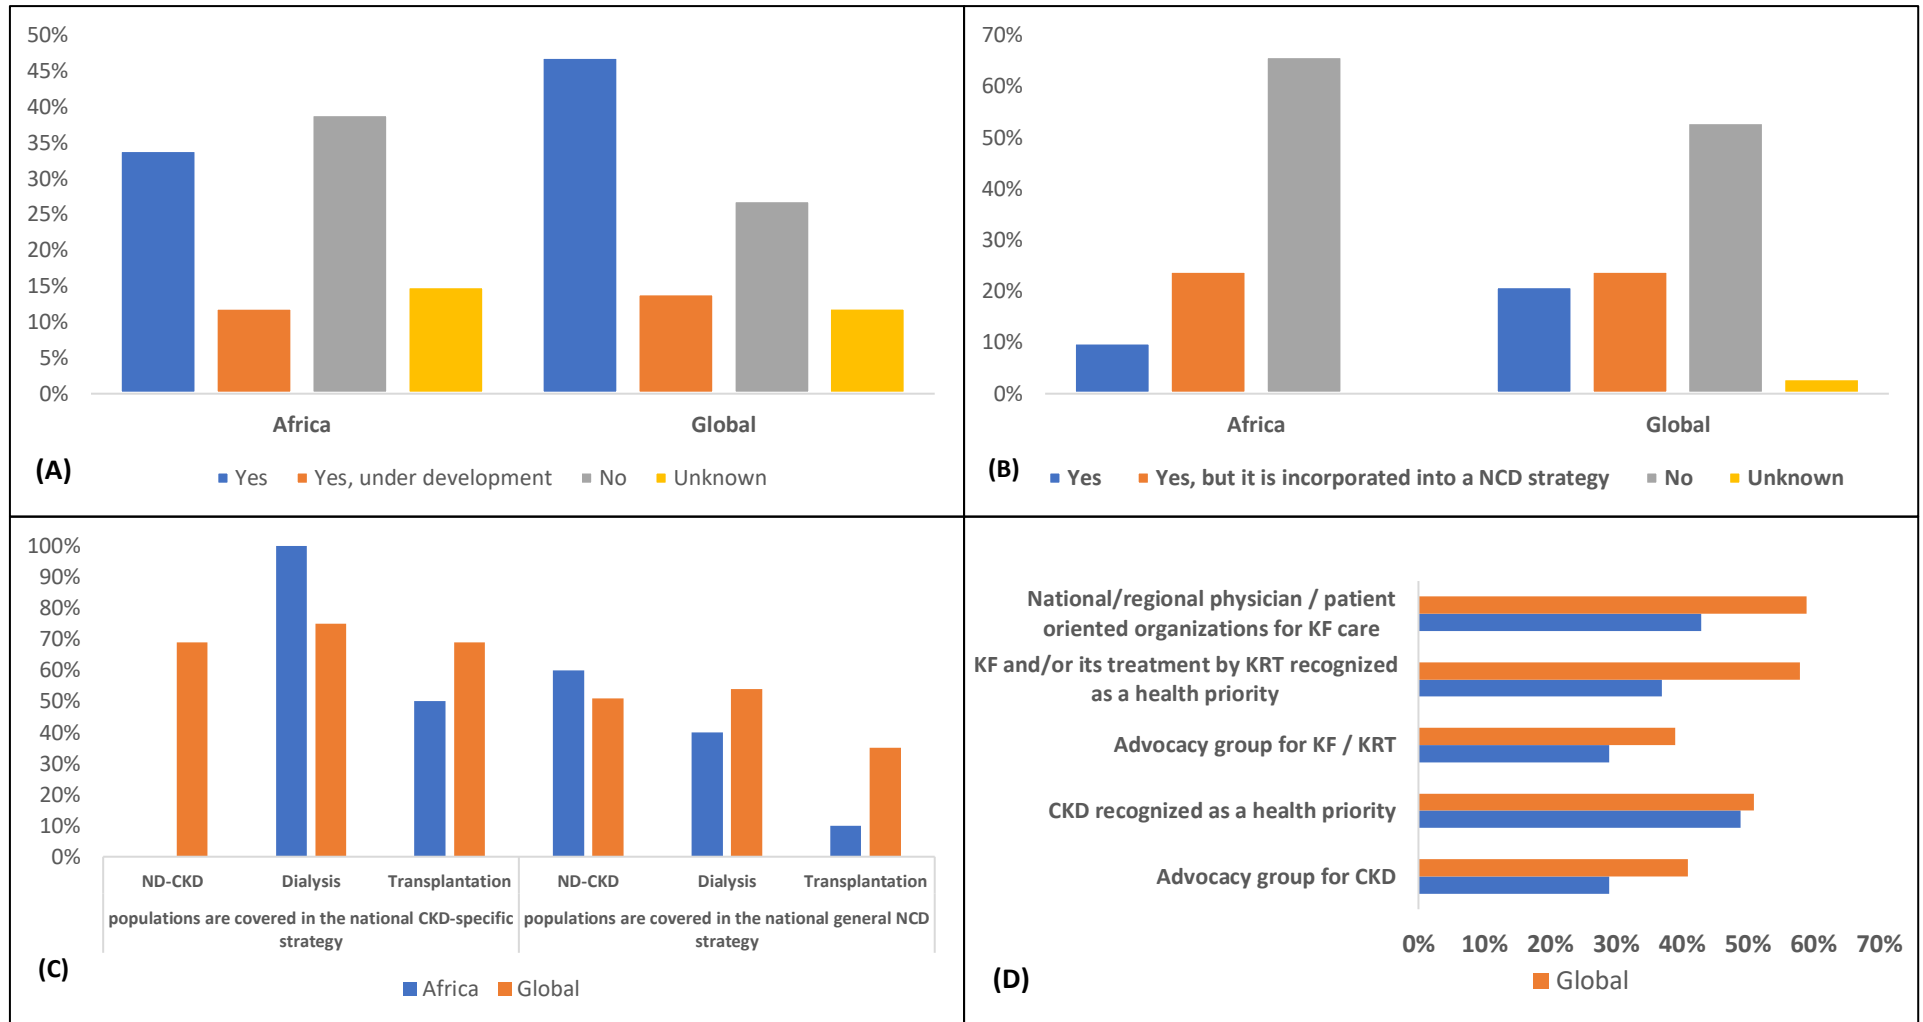

NCD: non-communicable diseases; CKD: chronic kidney disease; KF: kidney failure,  
 (Values represent absolute number of countries in each category expressed as a percentage of total number of countries)

**Figure S10:** Barriers to optimal kidney failure care in Africa.

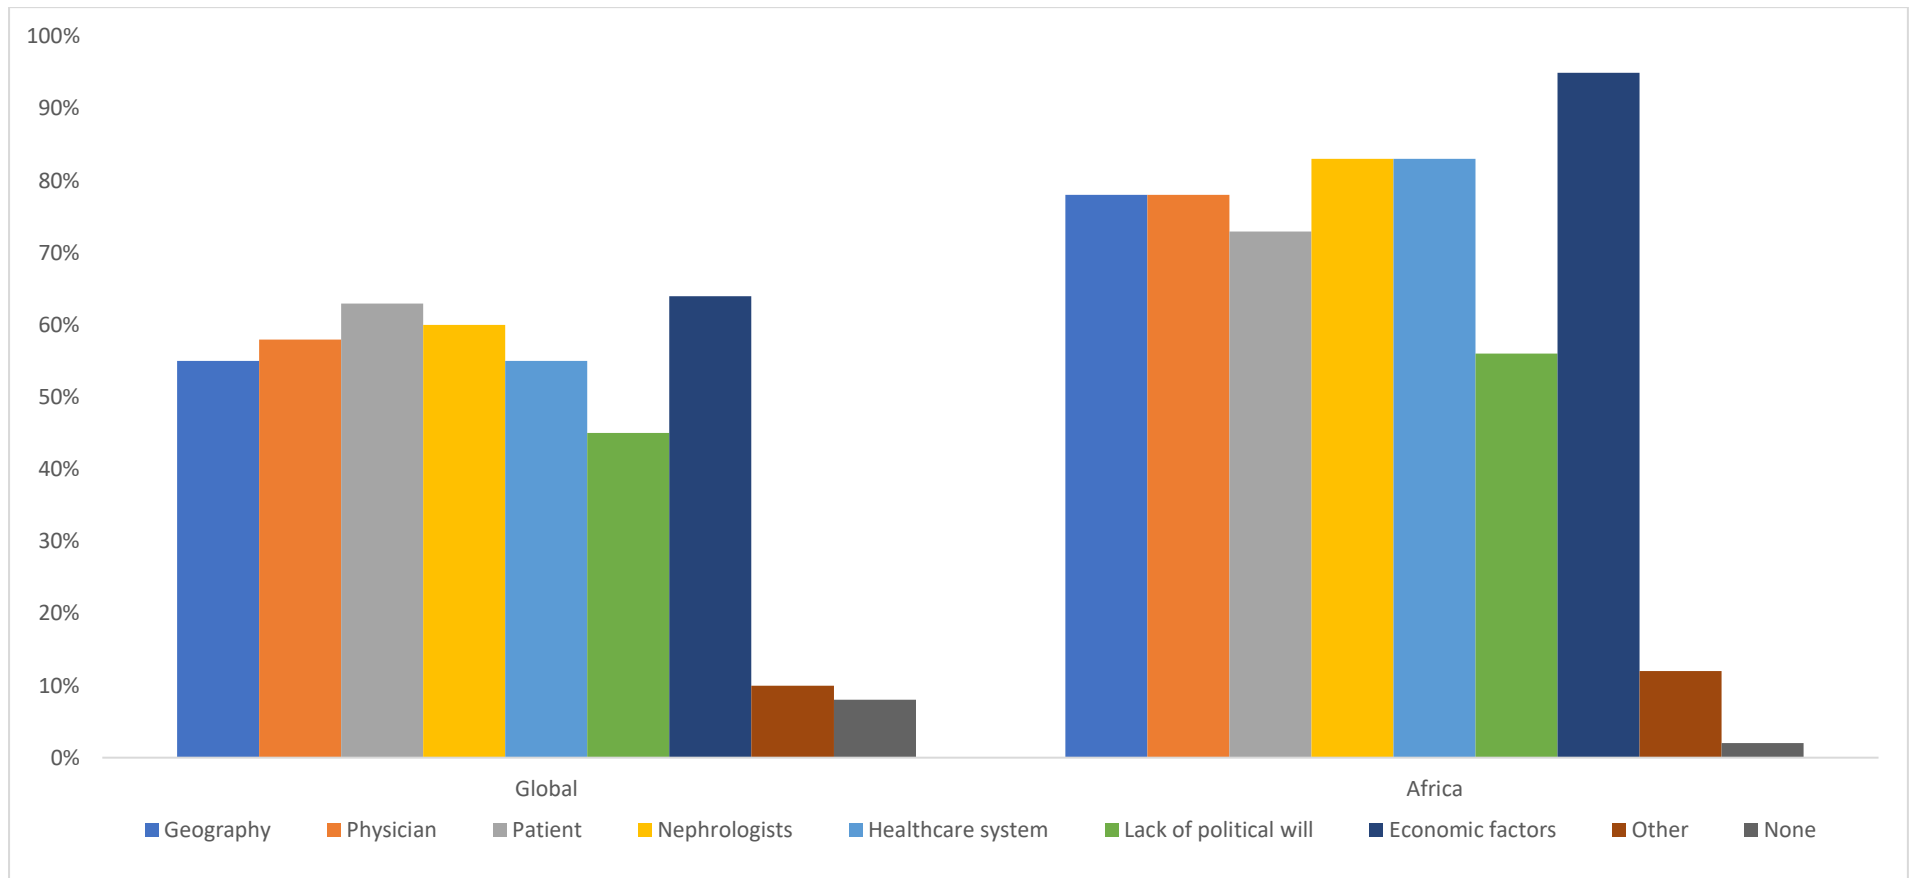

(Values represent absolute number of countries in each category expressed as a percentage of total number of countries)

### Supplementary References:

- S1. Institute for Health Metrics and Evaluation. Global Burden of Disease Study 2017 (GBD 2017) Data Resources. Available at: <http://ghdx.healthdata.org/gbd-2017>. Accessed August 6, 2020.
- S2. World Health Organization. The Global Health Observatory. Available at: <https://www.who.int/gho/en/>. Published 2019. Accessed: August 6, 2020.

**Appendix:** Reference list for annual cost of kidney replacement therapy (for Table 1) (APA format).

- Abu-Aisha, H., & Elamin, S. (2010). Peritoneal dialysis in Africa. *Peritoneal Dialysis International*, 30(1), 23-28.
- Elhassan, E. A., Kaballo, B., Fedail, H., Abdelraheem, M. B., Ali, T., Medani, S., ... & Awad, K. E. (2007). Peritoneal dialysis in the Sudan. *Peritoneal dialysis international*, 27(5), 503-510.
- Elsharif, M. E., GARIBALLA, E. E., & GADOUR, M. (2010). Costs of Hemodialysis and Kidney Transplantation in Sudan: A Single Center Experience.
- Haddiya, I., Radoui, A., Benamar, L., Ezaitouni, F., Ouzeddoun, N., Bayahia, R., & Rhou, H. (2012, December). Ten years of renal transplantation in a Moroccan hospital: results and constraints. In *Transplantation proceedings* (Vol. 44, No. 10, pp. 2976-2981). Elsevier.
- Mahmoud, K. M., Sheashaa, H. A., Gheith, O. A., Wafa, E. W., Agroudy, A. E., Sabry, A. A., ... & Sobh, M. A. (2010). Continuous ambulatory peritoneal dialysis in Egypt: progression despite handicaps. *Peritoneal dialysis international*, 30(3), 269-273.
- Matri, A., Elhassan, E., & Abu-Aisha, H. (2008). Renal replacement therapy resources in Africa. *Arab Journal of Nephrology and Transplantation*, 1(1), 9-14.
- Mushi, L., Krohn, M., & Flessa, S. (2015). Cost of dialysis in Tanzania: evidence from the provider's perspective. *Health economics review*, 5(1), 28.
- Niang, A., Cisse, M. M., Mahmoud, S. M. O. M., Lemrabott, A. T. O., Ka, E. H. F., & Diouf, B. (2014). Pilot experience in Senegal with peritoneal dialysis for end-stage renal disease. *Peritoneal Dialysis International*, 34(5), 539-543.
- Okafor, C., & Kankam, C. (2012). Future options for the management of chronic kidney disease in Nigeria. *Gender Medicine*, 9(1), S86-S93.
- Soliman, A. R., Fathy, A., & Roshd, D. (2012). The growing burden of end-stage renal disease in Egypt. *Renal failure*, 34(4), 425-428.
- Sumaili, E. K., Cohen, E. P., Zinga, C. V., Krzesinski, J. M., Pakasa, N. M., & Nseka, N. M. (2009). High prevalence of undiagnosed chronic kidney disease among at-risk

population in Kinshasa, the Democratic Republic of Congo. *BMC nephrology*, 10(1), 18.

Tshamba, H. M., Van Caillie, D., Naweji, F. N., Kapend, F. M., Kaj, F. M., Yav, G. D., & Naweji, P. T. (2014). Risk of death and the economic accessibility at the dialysis therapy for the renal insufficient patients in Lubumbashi city, Democratic Republic of Congo. *The Pan African Medical Journal*, 19.

van der Tol, A., Lameire, N., Morton, R. L., Van Biesen, W., & Vanholder, R. (2019). An international analysis of dialysis services reimbursement. *Clinical Journal of the American Society of Nephrology*, 14(1), 84-93.
